# Supplementary material for: Evaluation of xylooligosaccharide production from residual hemicelluloses of dissolving pulp by acid and enzymatic hydrolysis
Source: Royal Society of Chemistry journal article supplement (doi:10.1039/c8ra07140c), 2018-01-01
Supplement: c8ra07140c1.pdf [file c8ra07140c1.pdf]

## Supporting Information

# Evaluation of the xylooligosaccharides production from residual hemicelluloses of the dissolving pulp by acid and enzymatic hydrolysis

Yuanyuan Wang<sup>a</sup>, Xuefei Cao<sup>\*a</sup>, Ruochen Zhang<sup>a</sup>, Lin Xiao<sup>b</sup>, Tongqi Yuan<sup>a</sup>, Quentin Shi<sup>c</sup>, Runcang Sun<sup>\*a</sup>

<sup>a</sup> *Beijing Key Laboratory of Lignocellulosic Chemistry, Beijing Forestry University, Beijing, 100083, China*

<sup>b</sup> *Shandong Longlive Bio-Technology Co., Ltd., Shandong 251200, China*

<sup>c</sup> *Jining Mingsheng New Materials Co., Ltd., Xinglong Industrial Park, Yanzhou District, Jining City, Shandong Province, 272101, China*

\*Authors to whom correspondence should be addressed. X.F. Cao, R.C. Sun

E-mail: rcsun3@bjfu.edu.cn, caoxuefei@bjfu.edu.cn.

The structure of hemicelluloses was investigated using  $^1\text{H}$  NMR,  $^{13}\text{C}$  NMR, and 2D-HSQC NMR. Fig. S1 ( $^1\text{H}$  NMR) and Fig. S2 ( $^{13}\text{C}$  NMR) showed the structural information of the hemicelluloses and the signals are assigned based on the previous literature.<sup>31,S1</sup> As can be seen from Fig. S1, the major signals at 4.22 (H-1), 3.87 (H-5eq), 3.56 (H-4), 3.27 (H-3), 3.17 (H-5ax), 3.07 (H-2) ppm are assigned to  $\beta$ -D-xylopyranosyl ( $\beta$ -D-Xylp) units. In the  $^{13}\text{C}$  NMR spectrum (Fig. S2), five strong signals at 102.4, 75.8, 75.1, 73.4, and 63.3 ppm were observed, which are attributed to C-1, C-4, C-3, C-2, and C-5 of  $\beta$ -D-xylopyranosyl units. These results implied that the hemicelluloses were mainly consisted of  $\beta$ -D-xylopyranosyl units with few branches.

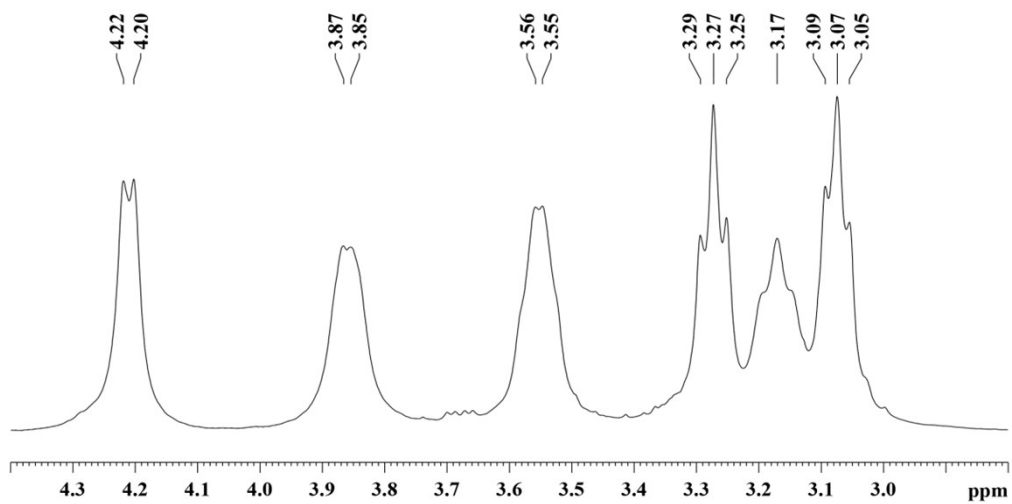

**Fig. S1.**  $^1\text{H}$  NMR spectrum of the hemicelluloses extracted from the dissolving pulp.

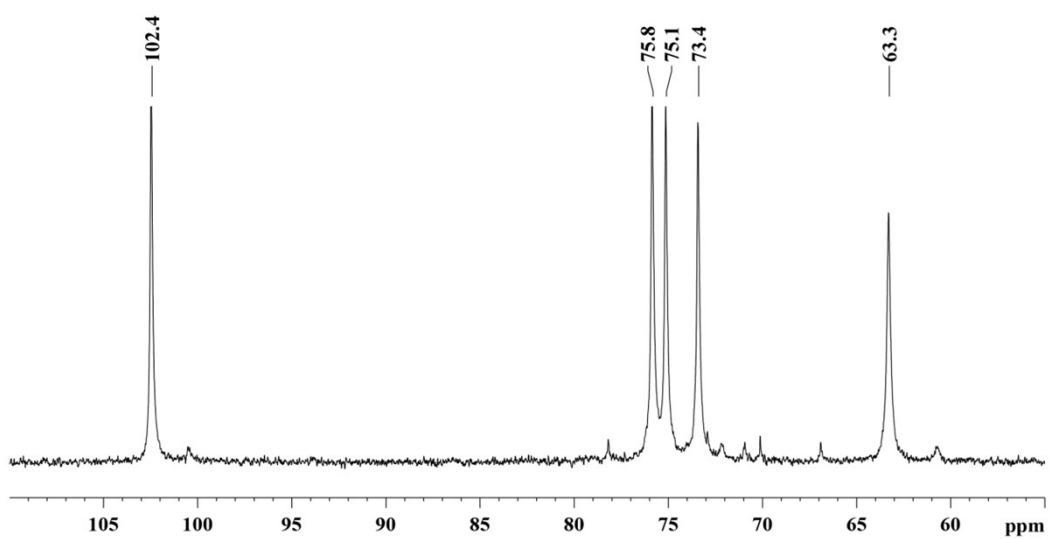

**Fig. S2.** <sup>13</sup>C NMR spectrum of the hemicelluloses extracted from the dissolving pulp.

**Table S1.** The molecular weight of the hemicelluloses extracted from the dissolving pulp

| $M_w$ (Da) | $M_n$ (Da) | $M_w/M_n$ |
|------------|------------|-----------|
| 14343.50   | 9295.65    | 1.54      |

## References

- (S1) Bian, J.; Peng, F.; Peng, P.; Xu, F.; Sun, R. C. Isolation and fractionation of hemicelluloses by graded ethanol precipitation from *Caragana korshinskii*. *Carbohydr. Res.* **2010**, *345* (6), 802-809.
